# Supplementary material
Source: PubMed Central journal article supplement (PMC4171350)

Figures and Tables

Fig. S1.

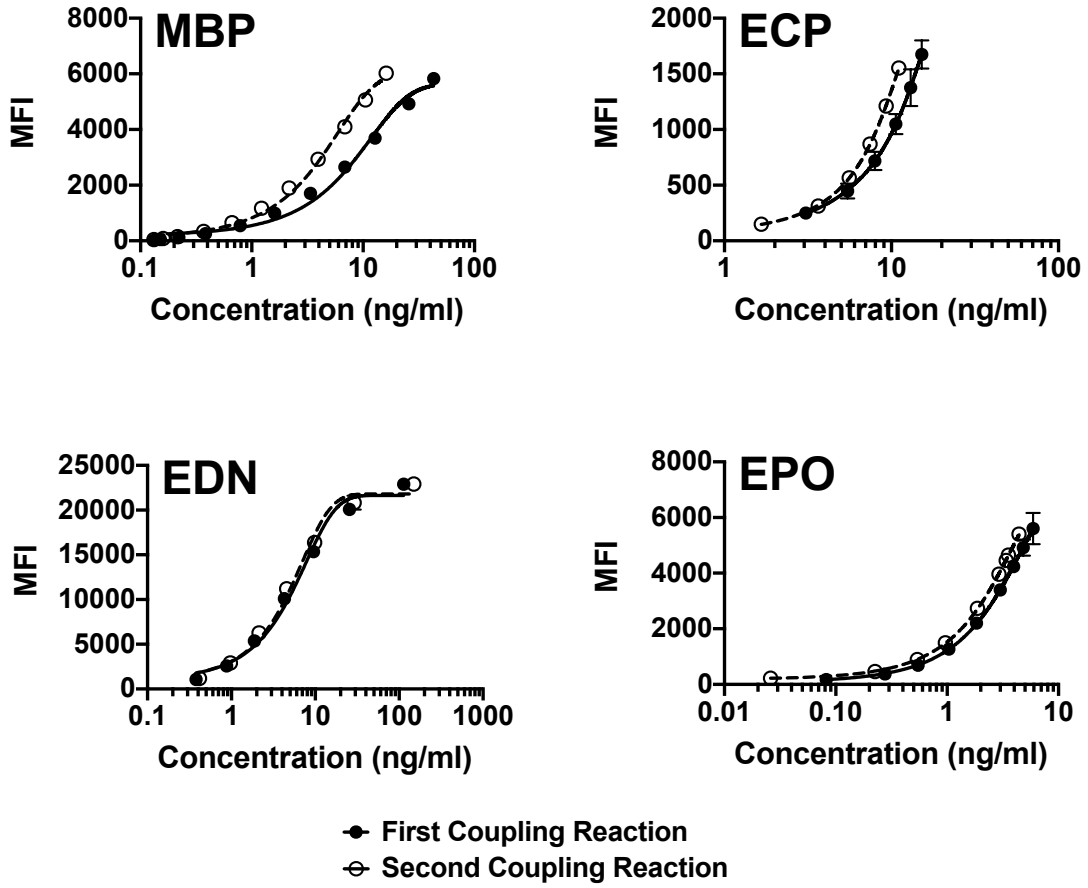

Fig. S2.

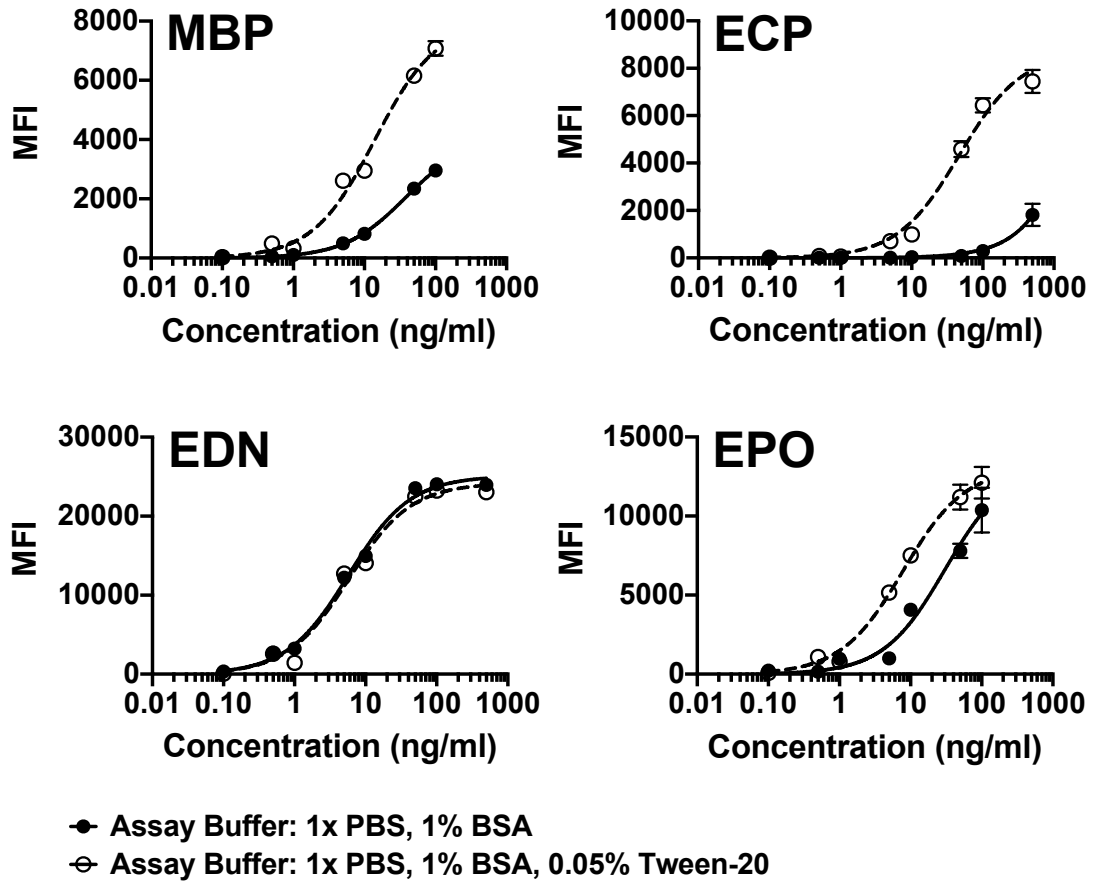

Fig. S3.

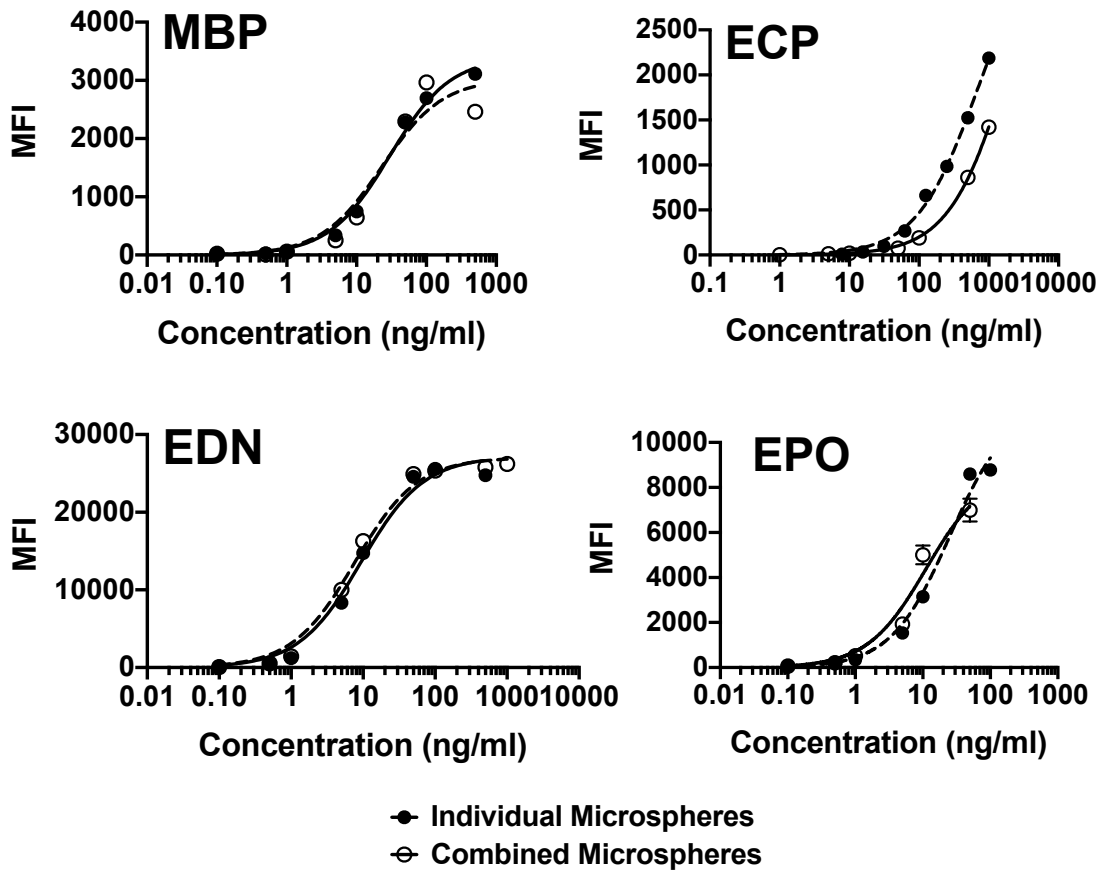

Fig. S4

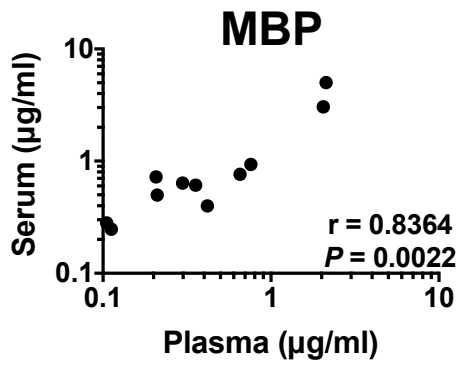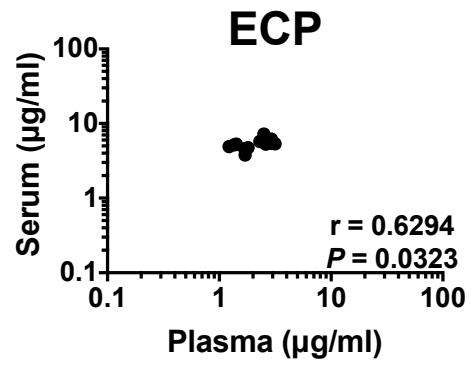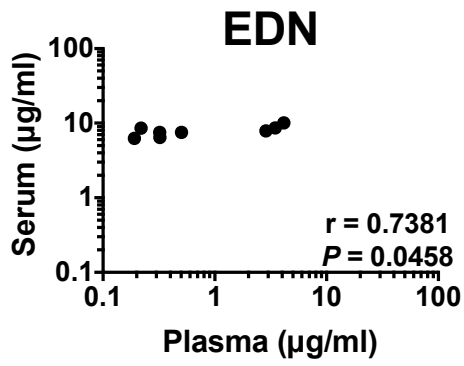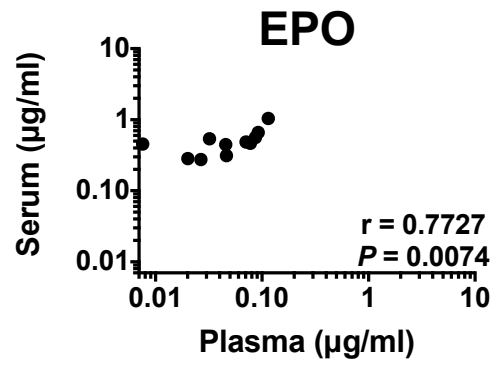

Fig. S5.

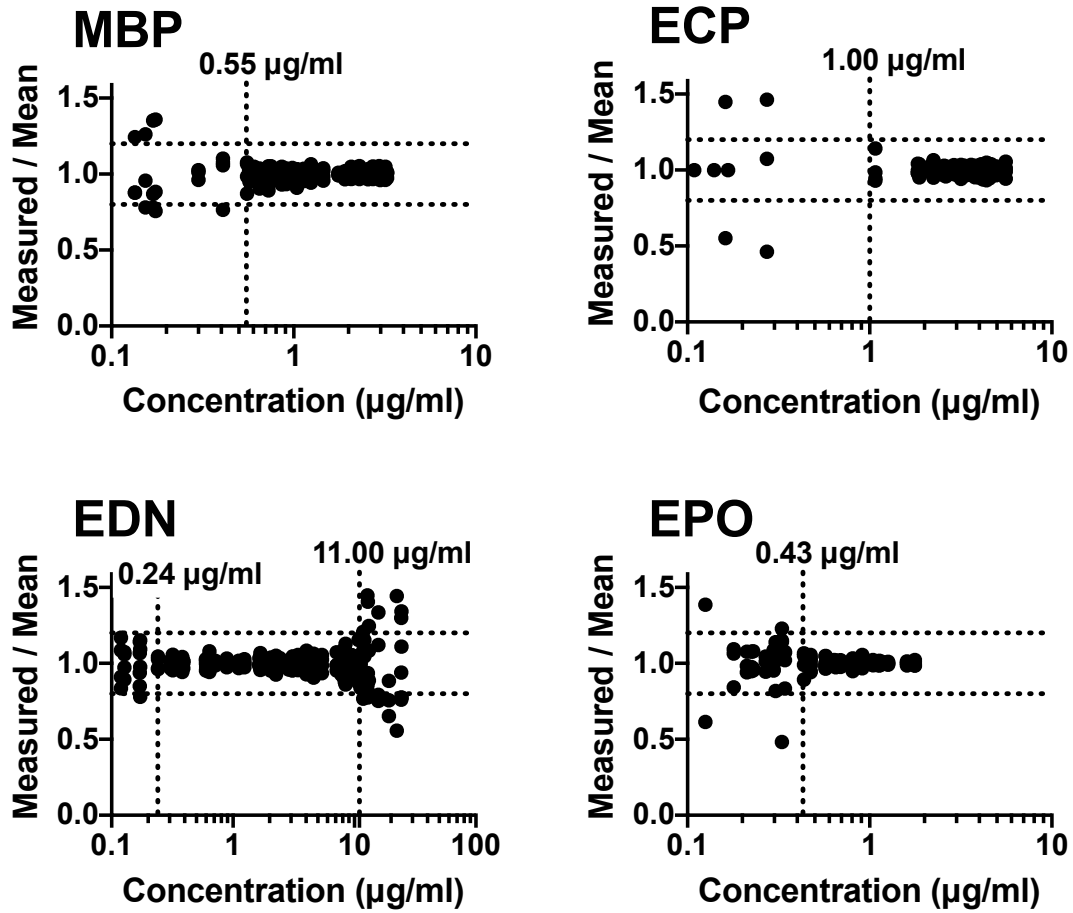

Fig. S6A.

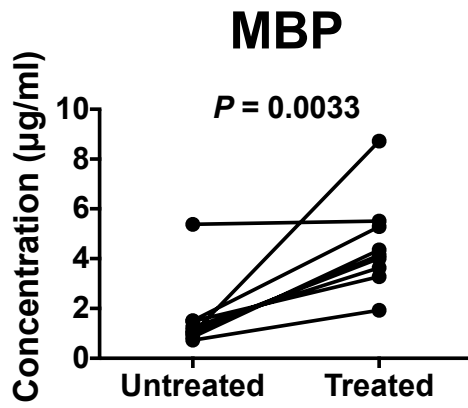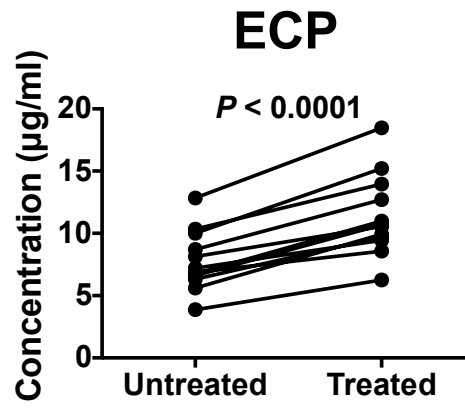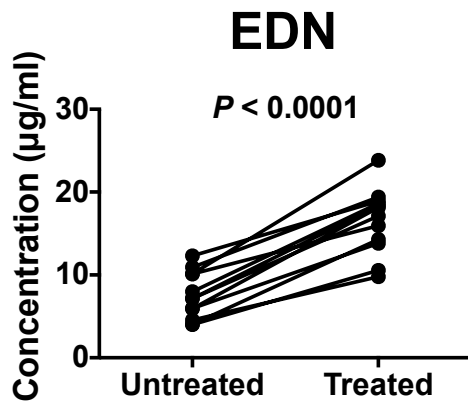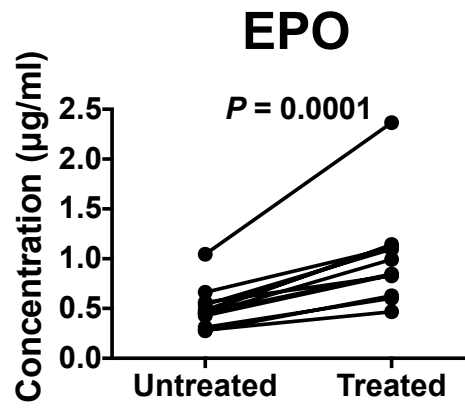

Fig. S6B.

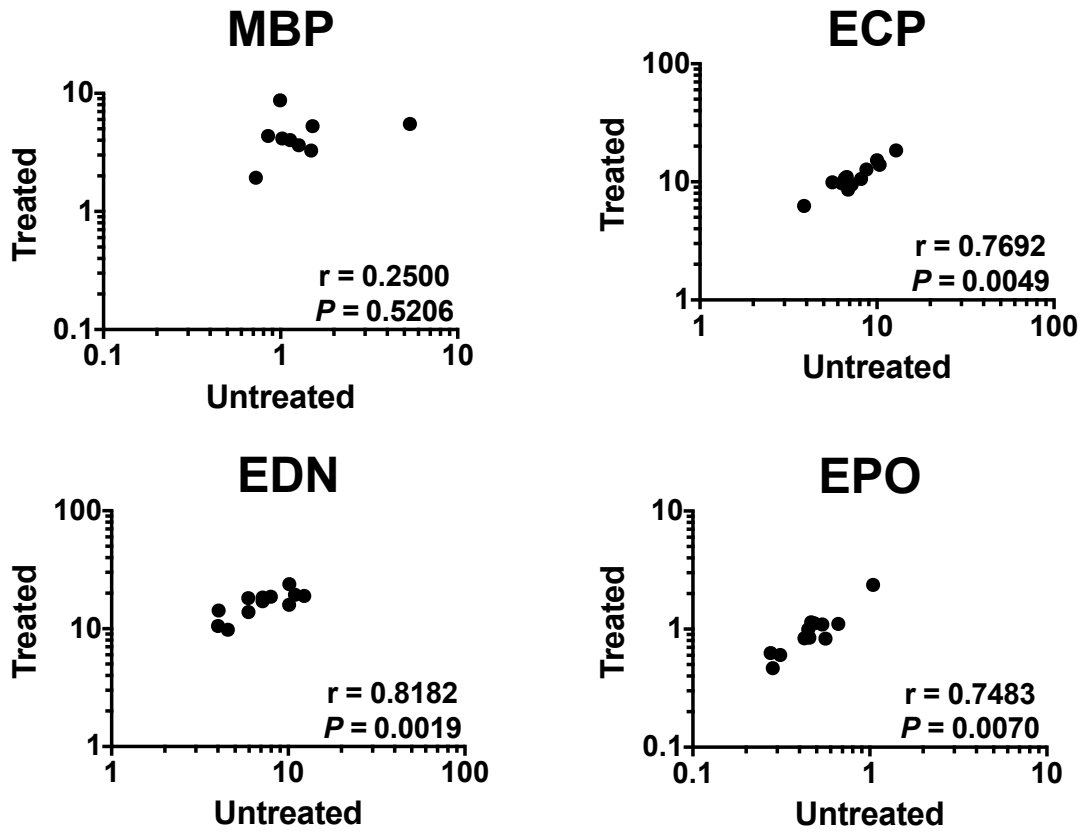

Supplement: NIHMS604759-supplement-01.pdf [file NIHMS604759-supplement-01.pdf]
